# Supplementary material for: Dip-coated colloidal quantum-dot films for high-performance broadband photodetectors
Source: Royal Society of Chemistry journal article supplement (doi:10.1039/c9tc00079h), 2019-01-01
Supplement: c9tc00079h1.pdf [file c9tc00079h1.pdf]

## Supporting Information

Dip-coating colloidal quantum dot film for high-performance  
broadband photodetector

*Ting Shen<sup>a</sup>, Jifeng Yuan<sup>a</sup>, Xinhua Zhong<sup>b\*</sup>, Jianjun Tian<sup>a\*</sup>*

*<sup>a</sup>Institute for Advanced Materials and Technology, University of Science and  
Technology Beijing, Beijing, 100083, China.*

*<sup>b</sup>College of Materials and Energy, South China Agricultural University, Guangzhou  
510642, China*

\*E-mail: zhongxh@sacu.edu.cn

\*E-mail: tianjianjun@mater.ustb.edu.cn

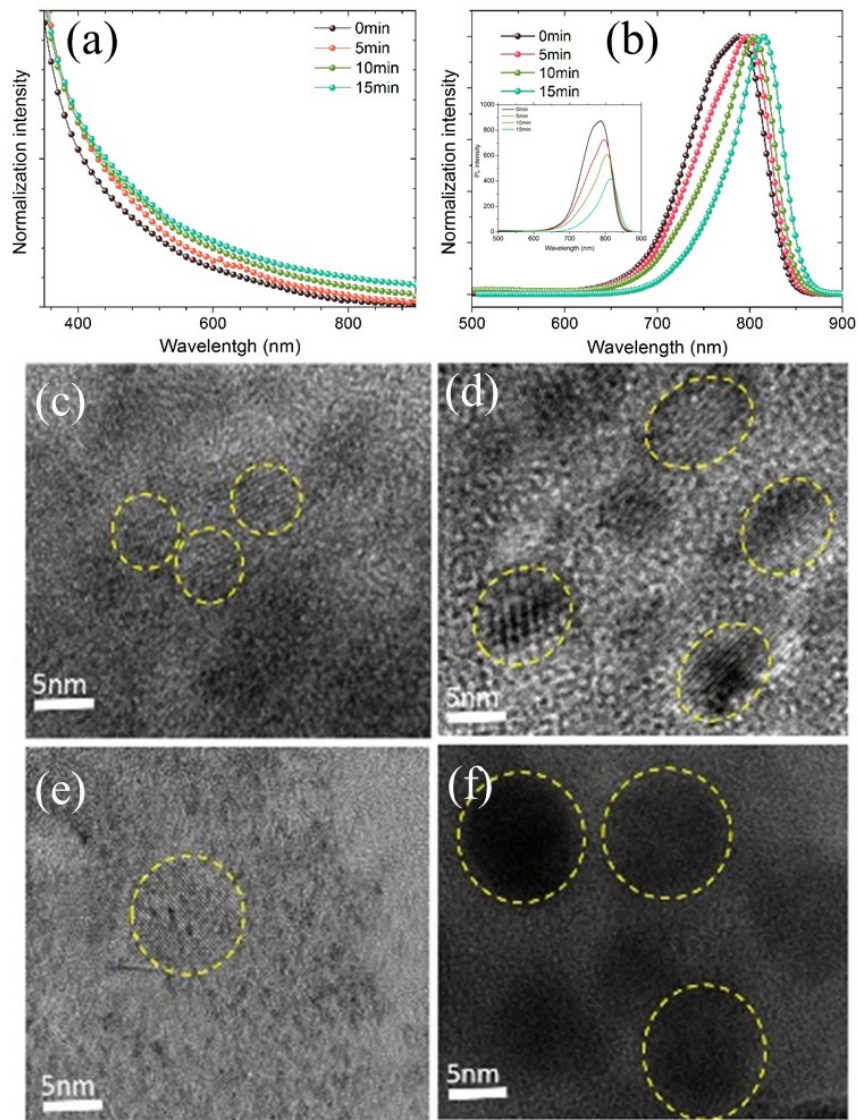

Figure S1. Absorption spectra (a) and the PL emission spectra (b) and the corresponding TEM images of QDs synthesized with different holding time, (a) 0 min, (b) 5 min, (c) 10 min, (d) 15 min.

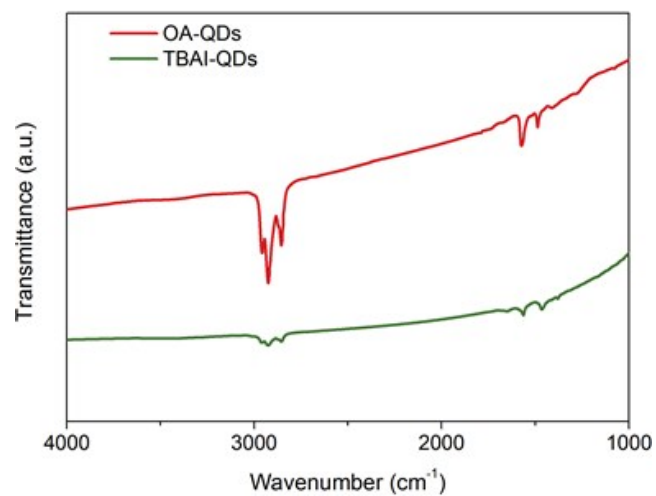

Figure S2. FTIR image of the  $\text{CdSe}_x\text{Te}_{1-x}$  QDs before and after ligand exchange.

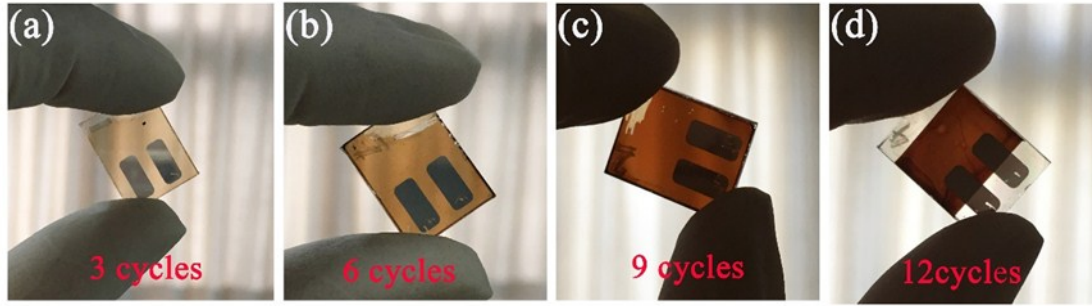

Figure S3. Photographs of sample fabricated by dip-coating at different cycles, (a) 3 cycles (b) 6 cycles (c) 9 cycles (d) 12 cycles.

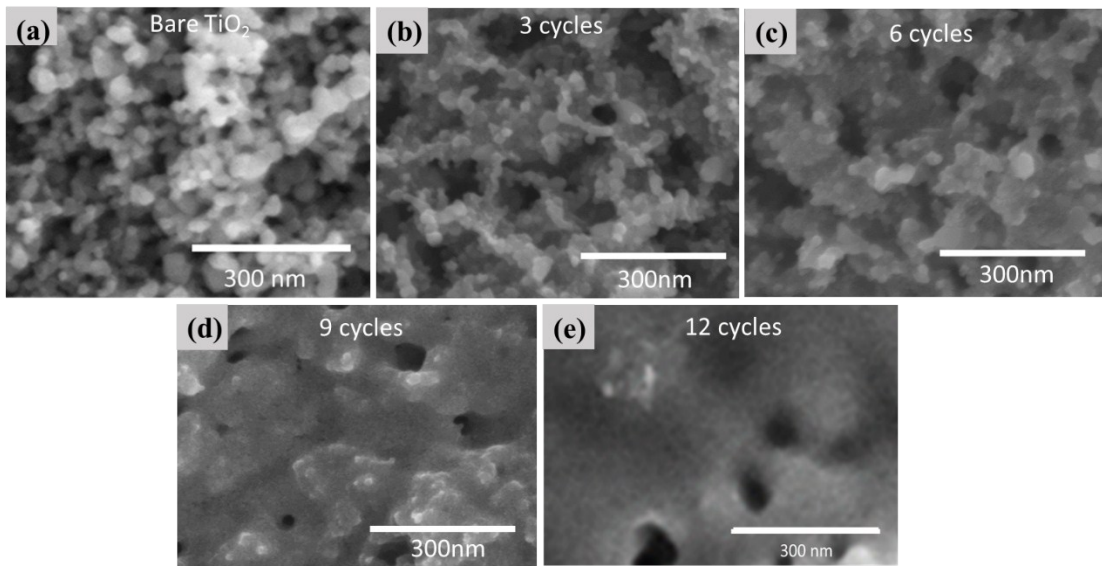

Figure S4. SEM image of the bare  $\text{TiO}_2$  film (a) and  $\text{CdSe}_x\text{Te}_{1-x}$  photoanode samples fabricated by dip-coating at different cycles, (b) 3 cycles, (c) 6 cycles, (d) 9 cycles, (e) 12 cycles.

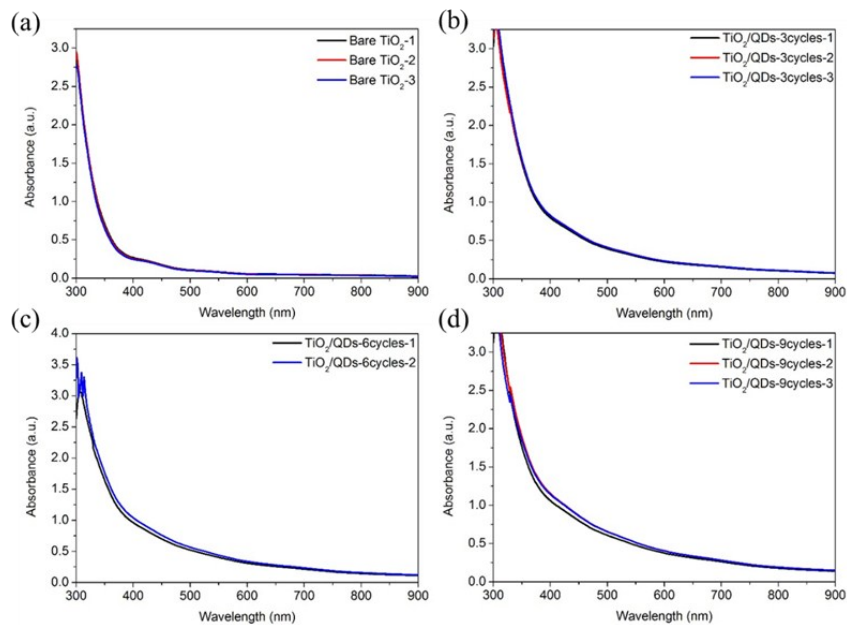

Figure S5. The repeatability property of the film preparation process. (a) the bare TiO<sub>2</sub> films, (b) the TiO<sub>2</sub>/QD-3cycles, (c) the TiO<sub>2</sub>/QDs-6cycles and (d) the TiO<sub>2</sub>/QDs-9cycles.

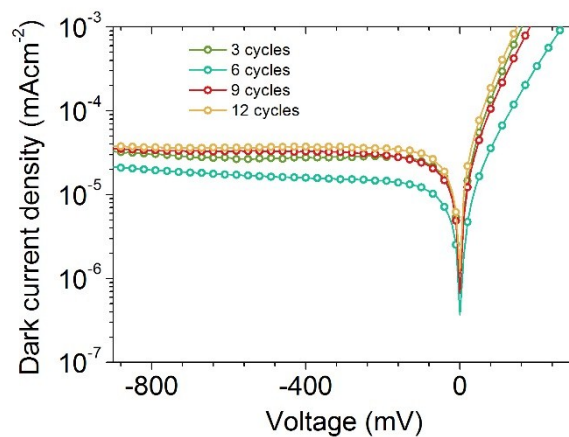

Figure S6. The dark current density-voltage curves of the four devices, 3-cycle QDs, 6-cycle QDs 9-cycle QDs and 12-cycle QDs based detectors.

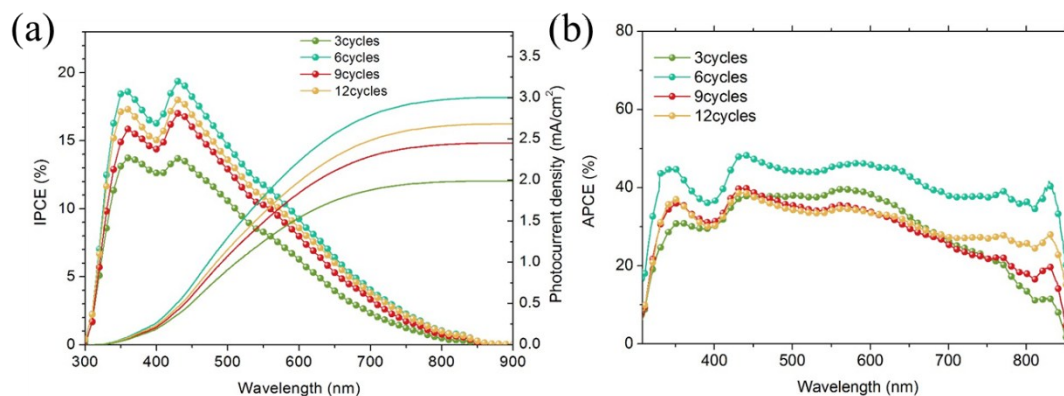

Figure S7. (a) Incident photon to charge carrier efficiency (IPCE) spectra curves and (b) absorbed photon to current conversion efficiency (APCE) curves of the device with different dip coating cycles.

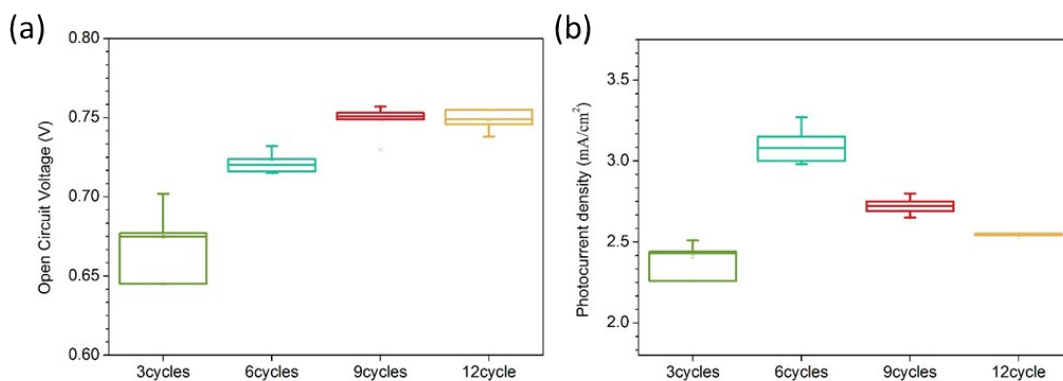

Figure S8. Influence and characterization of the different cycles in the fabricated

device. (a)  $V_{oc}$ , (b)  $I_{sc}$  versus different cycles measured under AM 1.5G illumination ( $100\text{mA}/\text{cm}^2$ )

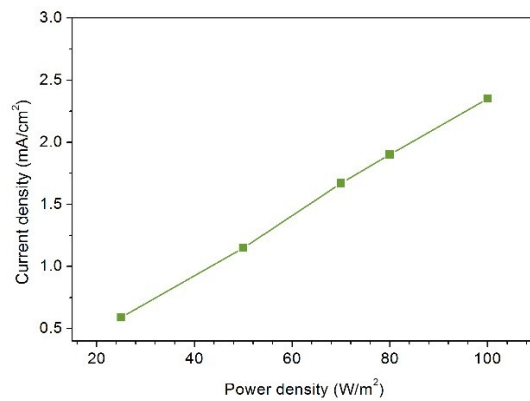

Figure S9. The relationship between current and incident irradiance.
